# Supplementary material
Source: PubMed Central journal article supplement (PMC2582168)
Supplement: tlo0104_0195SD1.pdf [file tlo0104_0195SD1.pdf]

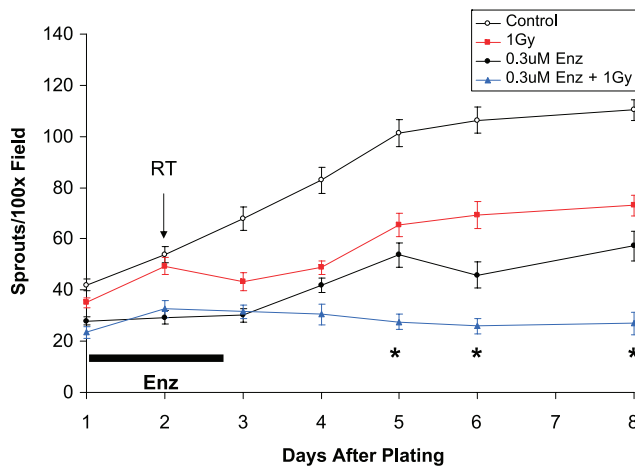

**Figure W1.** Human dermal microvessel endothelial cell formation of capillary sprouts on a collagen matrix treated with vehicle (open circles), 1 Gy (red squares), 0.3  $\mu$ M Enz for 48 hours (black circles), or 1 Gy in the middle of 0.3 mM Enz for 48 hours (blue triangles). Mean values of three independent experiments performed in triplicate  $\pm$  SEM are displayed. \* $P < .05$  between combination arm and control or single agent arms.

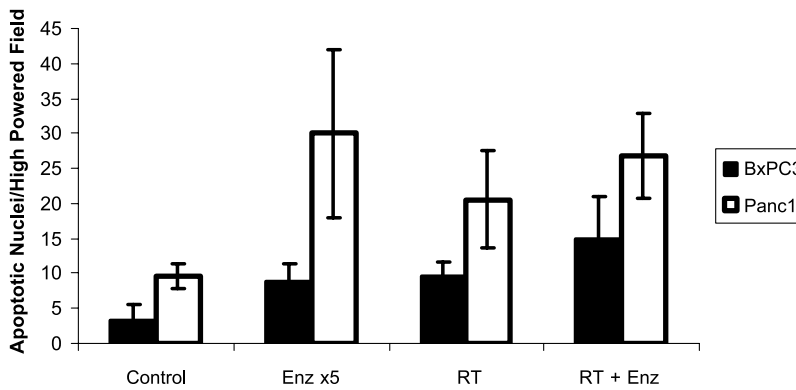

**Figure W2.** Nude mice bearing BxPC3 or Panc1 xenografts were treated with vehicle, Enz 100 mg/kg twice daily, 2 Gy once daily, or Enz and radiation. At least four tumors were collected immediately after the last treatment rendered and were stained for TUNEL.  $P =$  NS between combination arm and individual treatment arms.
